# Supplementary material for: Solvent specific synthesis of nano corpse flowery lithiated iron oxide as an energy storage and gas sensing material
Source: Royal Society of Chemistry journal article supplement (doi:10.1039/c5nj02058a), 2015-10-30
Supplement: c5nj02058a1.pdf [file c5nj02058a1.pdf]

## Electronic Supplementary

### Solvent specific synthesis of nano corpse flowery Lithiated iron oxide as energy storage and gas sensing material

Rasmita Barika, K.T.Leungb, Mamata Mohapatraa\*

Hydro & Electrometallurgy Department, CSIR- Institute of Minerals and Materials Technology, BBSR-751 013, Odisha, India

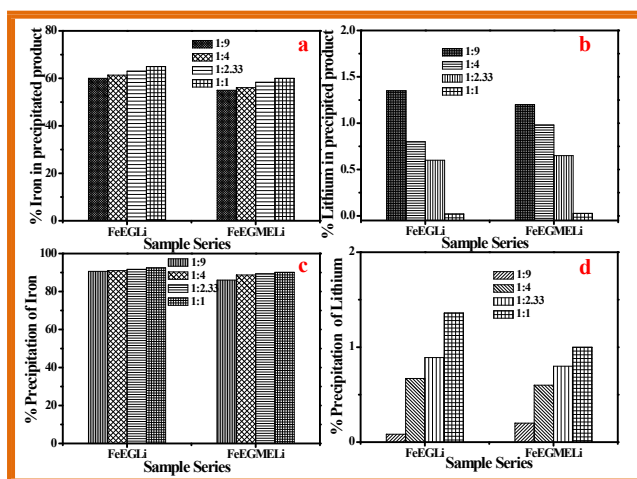

**Figure S<sub>1</sub>.** Effect of ratio of Li:Fe on (a) % iron in precipitated product, (b) % Li in precipitated product, (c) % iron precipitation, and (d) % Li precipitation, during synthesis of iron oxide in EG and EGME solvent mediated precipitation routes.

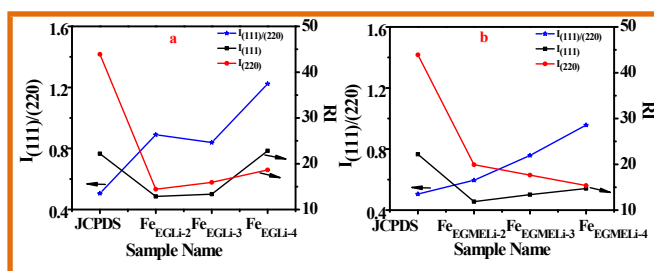

**Figure S<sub>2</sub>.** Relative intensities of the planes (111), (220) and their ratio  $I(111)/I(220)$  derived from XRD patterns of as synthesised  $\text{LiFeO}_2$  samples (a) EG and (b) EGME solvent mediated precipitation routes.

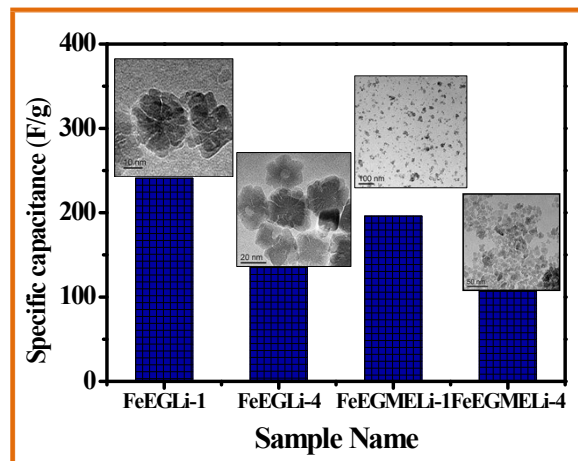

**Figure S<sub>3</sub>.** Specific capacitance values obtained from CV curve for the samples synthesized in presence of Li in EG and EGME medium.

**Table S<sub>1</sub>.** BET Surface areas, and pore volumes data of the samples synthesized in presence of Li in EG and EGME medium.

| Sample Name            | Surface area (m <sup>2</sup> /g) | Pore volume (cm <sup>3</sup> /g) |
|------------------------|----------------------------------|----------------------------------|
| Fe <sub>EGLi-1</sub>   | 123.9                            | 0.3824                           |
| Fe <sub>EGLi-4</sub>   | 40.86                            | 0.1563                           |
| Fe <sub>EGMELi-1</sub> | 105.1                            | 0.035                            |
| Fe <sub>EGMELi-4</sub> | 38.33                            | 0.0234                           |

**Table S<sub>2</sub>.** Various Synthesis methods for  $\alpha$ -LiFeO<sub>2</sub>, their morphology and application reported in literature.

| Synthesis Method                                                                                                                                                                    | Phase                        | Morphology                    | Property                                                    | Ref.       |
|-------------------------------------------------------------------------------------------------------------------------------------------------------------------------------------|------------------------------|-------------------------------|-------------------------------------------------------------|------------|
| Iron oxide +Lithium carbonate + 400–800°C for 12h in argon atmosphere.                                                                                                              | $\alpha$ -LiFeO <sub>2</sub> | Spherical                     | Magnetic and electrochemical properties                     | [7]        |
| $\alpha$ -FeOOH+ LiNO <sub>3</sub> +LiOH Hydrothermal                                                                                                                               | $\alpha$ -LiFeO <sub>2</sub> | -----                         | Discharge capacity-142 mAh/g)                               | [8]        |
| LiOH·H <sub>2</sub> O, 100 mM LiNO <sub>3</sub> and FeCl <sub>3</sub> ·6H <sub>2</sub> O heated at 120 °C in beakers for 4 h                                                        | $\alpha$ -LiFeO <sub>2</sub> | Rock salt                     | Supercapacitor and battery                                  | [9]        |
| Ag(CH <sub>3</sub> COO) solution +Li(CH <sub>3</sub> COO) solution + isopropyl alcohol (3 mL) + Fe(C <sub>5</sub> H <sub>7</sub> O <sub>2</sub> ) <sub>3</sub> at 400°C for 12 h.   | $\alpha$ -LiFeO <sub>2</sub> | -----                         | Photovoltaic cell and Battery                               | [10]       |
| $\alpha$ -FeOOH + LiNO <sub>3</sub> + LiOH heated at 523K , 3Kmin <sup>-1</sup> for $\alpha$ -LiFeO <sub>2</sub> 3 h.                                                               | $\alpha$ -LiFeO <sub>2</sub> | Rock-salt                     | 50F/g SC                                                    | [11]       |
| FeCl <sub>2</sub> ·4H <sub>2</sub> O + LiOH·H <sub>2</sub> O +LiNO <sub>3</sub> + Li <sub>2</sub> O <sub>2</sub> 300°C for 3 h in muffle furnace                                    | $\alpha$ -LiFeO <sub>2</sub> | Spheroidal                    | cathode material for lithium battery                        | [12]       |
| $\alpha$ -FOOH + FeCl <sub>3</sub> ·6H <sub>2</sub> O+ LiOH·H <sub>2</sub> O heated at 210°C, 6h                                                                                    | $\alpha$ -LiFeO <sub>2</sub> | cubic rock-salt               | Discharge capacity of 31 $\mu$ Ah/cm <sup>2</sup> · $\mu$ m | [13]       |
| FeCl <sub>2</sub> ·6H <sub>2</sub> O+ LiOH·H <sub>2</sub> O +LiNO <sub>3</sub> + Li <sub>2</sub> O <sub>2</sub> in alumina crucible and heated to 300°C for 3 h in a muffle furnace | $\alpha$ -LiFeO <sub>2</sub> | Clusters                      | High electronic conductivity                                | [14]       |
| LiOH·H <sub>2</sub> O + Fe (NO <sub>3</sub> ) <sub>3</sub> · 9H <sub>2</sub> O absolute alcohol, and then stirred for 3 h                                                           | $\alpha$ -LiFeO <sub>2</sub> | 10 nm spheroidal nanomaterial | Discharge Capacity of 101.5 mA h/ g after 50 cycles         | [16]       |
| Lithium hydroxide + $\alpha$ -FeOOH + 2-phenoxyethanol heated at 135–200°C for 4 h                                                                                                  | $\alpha$ -LiFeO <sub>2</sub> | -----                         | Li battery with cycling capacity                            | [17]       |
| $\alpha$ -NaFeO <sub>2</sub> +Na <sub>2</sub> CO <sub>3</sub> + Fe <sub>2</sub> O <sub>3</sub> heated at 900 °C for 12 h in.                                                        | $\alpha$ -LiFeO <sub>2</sub> | -----                         | Discharge capacity120 mAh/g at 100 mA/g Battery             | [18]       |
| $\beta$ -FeOOH +LiOH·H <sub>2</sub> O +Li <sub>2</sub> CO <sub>3</sub> + CH <sub>3</sub> COOLi + LiNO <sub>3</sub> + ethanol solution At 85°C.                                      | $\alpha$ -LiFeO <sub>2</sub> | Needle                        |                                                             | [19]       |
| LiOH·H <sub>2</sub> O + Fe (NO <sub>3</sub> ) <sub>3</sub> · 9H <sub>2</sub> O in EG/EGME, stirred for 3 h, 100°C.                                                                  | $\alpha$ -LiFeO <sub>2</sub> | Flowery/ spheroid             | Specific capacitance& gas sensor                            | This study |
